# Supplementary material for: Studying polymorphic variants of the NAT2 gene (NAT2*5 and NAT2*7) in Nenets populations of Northern Siberia
Source: BMC Genet. 2020 Oct 22;21(Suppl 1):115. doi: 10.1186/s12863-020-00909-4 (PMC7583309; doi:10.1186/s12863-020-00909-4)
Supplement: Supplementary file 1 — Additional file 1. Results of genotyping of point substitutions in NAT2 gene. File containing the results of genotyping (individuals genotypes) of point substitutions NAT2 * 5 T341C (rs 1801280) and NAT2 * 7 G857A (rs 1799931) by Real-time PCR. The study involved healthy volunteers, representatives of indigenous peoples, Forest Nenets and Tundra Nenets living in Purovsky district of Yamalo-Nenets Autonomous Okrug, Russian Federation, settlement Samburg for the Tundra Nenets and settlements Kharampur, Khalyasavey, Tarko-Sale for the Forest Nenets. All research participants gave a written informed consent to the clinical examination and the publication of their anonymous data. [file 12863_2020_909_MOESM1_ESM.xls]

## Sheet: Лист1
File containing the results of genotyping (individuals genotypes) of point substitutions NAT2 * 5 C341T (rs 1801280) and NAT2 * 7 G857A (rs 1799931) by Real-time PCR.
The study involved healthy volunteers, representatives of indigenous peoples, Forest Nenets and Tundra Nenets living in Purovsk and Samburg, Yamalo-Nenets Autonomous Okrug, Russian Federation.
All research participants gave a written informed consent to the clinical examination and the publication of their anonymous data.

## Sheet: Forest Nenets_145_NAT2-5
DNA code	Genotype, NAT2*5 T341C
Pur165	TT
Pur167	TT
Pur173	TT
Pur176	TT
Pur177	TC
Pur178	TC
Pur179	TC
Pur202	TT
Pur206	TC
Pur209	TT
Pur214	TC
Pur215	TC
Pur219	TC
Pur229	CC
Pur230	CC
Pur233	TT
Pur236	TC
Pur237	TC
Pur238	TC
Pur240	TC
Pur241	TC
Pur244	TT
Pur245	TT
Pur247	TC
Pur250	CC
Pur253	TC
Pur256	TT
Pur258	TC
Pur259	TC
Pur261	TC
Pur262	TT
Pur263	TC
Pur266	TC
Pur272	CC
Pur276	TC
Pur279	TT
Pur281	TC
Pur282	TT
Pur284	TC
Pur285	TT
Pur286	TC
Pur288	TC
Pur292	TC
Pur297	TC
Pur299	TC
Pur300	CC
Pur303	TT
Pur305	TT
Pur306	CC
Pur308	TT
Pur310	TC
Pur311	TC
Pur313	TC
Pur317	TT
Pur319	TC
Pur325	TT
Pur327	TC
Pur328	TT
Pur330	TC
Pur331	CC
Pur333	TC
Pur336	CC
Pur337	TC
Pur338	TT
Pur343	TT
Pur344	CC
Pur350	TT
Pur351	CC
Pur355	TC
Pur356	TC
Pur357	TC
Pur359	TT
Pur363	CC
Pur364	CC
Pur366	TT
Pur625	TC
Pur627	TT
Pur635	TC
Pur648	TC
Pur652	TT
Pur653	TC
Pur662	TT
Pur671	TT
Pur684	CC
Pur689	TT
Pur691	TT
Pur692	TT
Pur694	TT
Pur695	TC
Pur698	TT
Pur699	TT
Pur704	TT
Pur706	TC
Pur708	TC
Pur711	CC
Pur712	CC
Pur714	TC
Pur716	TC
Pur717	CC
Pur718	TT
Pur719	TC
Pur721	TT
Pur722	TT
Pur725	TC
Pur727	TT
Pur729	TC
Pur730	CC
Pur731	TC
Pur732	TC
Pur735	TC
Pur736	TT
Pur740	TC
Pur741	TT
Pur742	TT
Pur743	TT
Pur744	TC
Pur753	TC
Pur754	TC
Pur756	CC
Pur758	TC
Pur761	TC
Pur762	CC
Pur764	TC
Pur766	CC
Pur767	TT
Pur771	TT
Pur772	TT
Pur773	TT
Pur775	CC
Pur776	CC
Pur780	TC
Pur783	TT
Pur786	TT
Pur788	TC
Pur791	TT
Pur793	TC
Pur794	TT
Pur795	TT
Pur796	TC
Pur838	TT
Pur839	TT
Pur843	TC
Pur846	TC
Pur852	TC
Pur858	TC

## Sheet: Forest Nenets_165_Nat2-7
DNA code	Genotype, NAT2*7 G857A
Pur165	GA
Pur167	GG
Pur173	GA
Pur176	GG
Pur177	GG
Pur178	GG
Pur179	GG
Pur181	GG
Pur182	GG
Pur183	GG
Pur195	GG
Pur198	AA
Pur202	GG
Pur205	GA
Pur206	GG
Pur209	GG
Pur210	GG
Pur211	GG
Pur214	GG
Pur215	GG
Pur216	GG
Pur219	GG
Pur225	GG
Pur226	GG
Pur229	GG
Pur230	GG
Pur233	GA
Pur235	GG
Pur236	GG
Pur237	GG
Pur238	GG
Pur240	GG
Pur241	GG
Pur242	GG
Pur245	GG
Pur247	GG
Pur250	GG
Pur253	GG
Pur256	GG
Pur258	GG
Pur259	GG
Pur261	GG
Pur262	GG
Pur263	GG
Pur266	GG
Pur272	GG
Pur279	GA
Pur281	GA
Pur282	GG
Pur284	GG
Pur285	GG
Pur286	GG
Pur288	GA
Pur297	GG
Pur299	GA
Pur300	GG
Pur303	GA
Pur305	GG
Pur306	GG
Pur308	GG
Pur310	GG
Pur311	GG
Pur313	GG
Pur317	GG
Pur319	GG
Pur321	GG
Pur324	GG
Pur325	GG
Pur328	GG
Pur330	GG
Pur331	GG
Pur333	GG
Pur336	GG
Pur337	GG
Pur338	GG
Pur366	GG
Pur575	GA
Pur586	GG
Pur594	GG
Pur595	GA
Pur600	GG
Pur601	GG
Pur602	GG
Pur609	GG
Pur617	GG
Pur618	GG
Pur619	GG
Pur621	GA
Pur625	GG
Pur640	GG
Pur641	GG
Pur645	GG
Pur646	GG
Pur648	GG
Pur649	GG
Pur650	GG
Pur652	GG
Pur653	GG
Pur659	GG
Pur660	GG
Pur662	GA
Pur670	GG
Pur671	GG
Pur677	GA
Pur680	GG
Pur683	GA
Pur684	GG
Pur689	GG
Pur691	GG
Pur692	GA
Pur693	GG
Pur694	GA
Pur695	GA
Pur698	GG
Pur699	GG
Pur700	GG
Pur704	GG
Pur706	GA
Pur708	GG
Pur711	GG
Pur712	GG
Pur714	GG
Pur716	GG
Pur717	GG
Pur718	GG
Pur719	GA
Pur721	GG
Pur725	GG
Pur727	GG
Pur729	GG
Pur731	GG
Pur732	GG
Pur735	GG
Pur736	GG
Pur740	GG
Pur741	GA
Pur742	GG
Pur743	GA
Pur744	GG
Pur753	GG
Pur754	GG
Pur756	GG
Pur758	GG
Pur761	GA
Pur762	GG
Pur764	GG
Pur766	GG
Pur767	GG
Pur770	GG
Pur771	GG
Pur772	GG
Pur773	GA
Pur775	GG
Pur776	GG
Pur780	GG
Pur783	GG
Pur786	GG
Pur788	GG
Pur791	GG
Pur795	GA
Pur838	GG
Pur839	GG
Pur843	GG
Pur846	GG
Pur852	GG

## Sheet: Tundra Nenets_91_Nat2-5
DNA code	Genotype, NAT2*5 T341C
Sam0003=521	TT
Sam0031=607	TC
Sam0033	TC
Sam0034	TC
Sam0048=609	TC
Sam0088	TT
Sam0090	TC
Sam0092	TT
Sam0093	TT
Sam0094	TC
Sam0095	TT
Sam0104	TC
Sam0105	TT
Sam0107	TT
Sam0109	TT
Sam0110	TT
Sam0114	СС
Sam0117	TT
Sam0119	TT
Sam0120	TC
Sam0121	TT
Sam0122	TT
Sam0123=663=951	TC
Sam0126	TT
Sam0130	TC
Sam0132	TC
Sam0138	TT
Sam0139	TT
Sam0140	TC
Sam0151	TC
Sam0160	TC
Sam0166	TT
Sam0181	TT
Sam0188	TC
Sam0196	TC
Sam0197	TC
Sam0203	TC
Sam0211	TC
Sam0223	TC
Sam0225	TT
Sam0255	TT
Sam0256	TT
Sam0257	TT
Sam0273	TT
Sam0275	TT
Sam0281	TC
Sam0282	СС
Sam0291	TT
Sam0292	TT
Sam0295	TC
Sam0301	TC
Sam0302	TC
Sam0307	TT
Sam0309	СС
Sam0312	TT
Sam0315	TT
Sam0316	TT
Sam0317	TC
Sam320	СС
Sam0321	TC
Sam0325	TC
Sam0328	TC
Sam0331	TT
Sam0342	TT
сасм349	TT
Sam0357	TT
Sam0359	TC
Sam0370	TC
Sam0372	TT
Sam0373	TT
Sam0374	TC
Sam0394	TC
Sam2216	TC
Sam2222	TC
Sam2227	TT
Sam2232	TC
Sam2233=1854	TT
Sam2236=2072	TT
Sam2244	TT
Sam2248=358	TT
Sam2256	TC
Sam2260	TT
Sam2299	TC
Sam2313	TC
Sam2314	TT
Sam2317	TC
Sam2327	TC
Sam2348	TC
Sam2354	TT
Sam2388	СС
Sam2396	TT

## Sheet: Tundra Nenets_97_Nat2-7
DNA code	Genotype, NAT2*7 G857A
Sam0031=607	GG
Sam0033	GG
Sam0034	GG
Sam0048=609	GG
Sam0088	GA
Sam0090	GG
Sam0092	GG
Sam0095	GA
Sam0104	GG
Sam0105	GA
Sam0107	GG
Sam0109	GG
Sam0110	GG
Sam0114	GG
Sam0117	GG
Sam0119	GG
Sam0120	GG
Sam0121	GG
Sam0122	GA
Sam0123=663=951	GG
Sam0126	GG
Sam0130	GG
Sam0132	GG
Sam0137	GG
Sam0138	GG
Sam0139	GA
Sam0140	GA
Sam0151	GG
Sam0160	GG
Sam0166	GG
Sam0181	GA
Sam0188	GA
Sam0196	GG
Sam0197	GG
Sam0203	GG
Sam208	GG
Sam210	GG
Sam0211	GG
Sam0223	GG
Sam0225	GG
Sam0255	GG
Sam0256	GG
Sam0257	GA
Sam0273	GG
Sam0275	GG
Sam0281	GA
Sam0282	GG
Sam0291	GG
Sam0292	GG
Sam0295	GG
Sam0301	GG
Sam0302	GG
Sam0307	GA
Sam0309	GG
Sam0312	GA
Sam0315	GG
Sam0317	GG
Sam320	GG
Sam0321	GG
Sam0325	GA
Sam0328	GG
Sam0331	GG
Sam0342	GA
Sam0355	GG
сасм349	GA
Sam0357	GA
Sam0359	GG
Sam0370	GG
Sam0372	GG
Sam0373	GG
Sam0374	GG
Sam0385	GG
Sam0394	GG
Sam0584	GG
Sam2216	GG
Sam2222	GG
Sam2227	GG
Sam2232	GG
Sam2233=1854	GA
Sam2236=2072	GA
Sam2244	GG
Sam2248=358	GG
Sam2256	GG
Sam2260	GA
Sam2264	GG
Sam2271	GG
Sam2299	GG
Sam2313	GG
Sam2314	GG
Sam2317	GG
Sam2327	GG
Sam2348	GG
Sam2354	GG
Sam2370	GG
Sam2388	GG
Sam2396	GG
Sam2412	GG
